# Supplementary material for: Elucidating arsenic-bound proteins in the protein data bank: data mining and amino acid cross-validation through Raman spectroscopy
Source: Royal Society of Chemistry journal article supplement (doi:10.1039/d3ra05987a), 2023-01-01
Supplement: d3ra05987a1.pdf [file d3ra05987a1.pdf]

## Elucidating Arsenic-Bound Proteins in the Protein Data Bank: Data Mining and Amino Acid Cross-Validation through Raman Spectroscopy

Upendra Nayek<sup>1</sup>, Sudarshan Acharya<sup>1</sup>, Abdul Ajees Abdul Salam<sup>1\*</sup>

<sup>1</sup>Department of Atomic and Molecular Physics, Manipal Academy of Higher Education, Manipal, Karnataka 576 104, India.

\*Corresponding Author: [abdul.ajees@manipal.edu](mailto:abdul.ajees@manipal.edu); Phone: +91 8147966458

### Supplementary Information

**Supplementary Table 1** Exploring arsenical protein ids and specified arsenical ligands [As(III)] through data mining: unveiling insights and patterns.

| Ligand ID | Ligand Name                                                 | Chemical formulas                                                                     | Molecular weight | Total No. (902) | PDB ID                  |
|-----------|-------------------------------------------------------------|---------------------------------------------------------------------------------------|------------------|-----------------|-------------------------|
| RMO       | [arsenothionito(2-<br>)-<br>kappa~2~O,S](ox<br>o)molybdenum | AsHMoO <sub>3</sub><br>S                                                              | 251.93           | 1               | 3SR6                    |
| RXO       | 4-arsanyl-2-<br>nitrophenol                                 | C <sub>6</sub> H <sub>6</sub><br>AsNO <sub>3</sub>                                    | 215.04           | 2               | 4RSR, 5V0F              |
| 5AU       | Di-glutathione-<br>PhenylArsine                             | C <sub>26</sub><br>H <sub>37</sub> AsN <sub>6</sub><br>O <sub>12</sub> S <sub>2</sub> | 764.66           | 2               | 5DAL, 5DDL              |
| CZ2       | Sdihydroxyarsino<br>)cysteine                               | C <sub>3</sub> H <sub>8</sub> AsN<br>O <sub>4</sub> S                                 | 229.09           | 3               | 1SK0, 1SJZ, 6EU7        |
| CZZ       | Thiarsahydroxy-                                             | C <sub>3</sub> H <sub>7</sub> AsN                                                     | 212.08           | 5               | 1J9B, 6YH0, 6TSQ, 6TSR, |

| Ligand ID | Ligand Name                  | Chemical formulas                                  | Molecular weight | Total No. (902) | PDB ID                                                                                                                                                                                                                                                                                                                                                                                                                                                                                                                                                                                                                                                                                                                                                                                                                                                                                                                                                                                                                                                                                                                                                                                                                                                         |
|-----------|------------------------------|----------------------------------------------------|------------------|-----------------|----------------------------------------------------------------------------------------------------------------------------------------------------------------------------------------------------------------------------------------------------------------------------------------------------------------------------------------------------------------------------------------------------------------------------------------------------------------------------------------------------------------------------------------------------------------------------------------------------------------------------------------------------------------------------------------------------------------------------------------------------------------------------------------------------------------------------------------------------------------------------------------------------------------------------------------------------------------------------------------------------------------------------------------------------------------------------------------------------------------------------------------------------------------------------------------------------------------------------------------------------------------|
|           | cysteine                     | O <sub>3</sub> S                                   |                  |                 | 6TSN                                                                                                                                                                                                                                                                                                                                                                                                                                                                                                                                                                                                                                                                                                                                                                                                                                                                                                                                                                                                                                                                                                                                                                                                                                                           |
| PA0       | Phenylarsine oxide           | C <sub>6</sub> H <sub>5</sub> AsO                  | 168.03           | 5               | 3E3Z, 4KW7, 5EG5, 5DAL, 6QHK                                                                                                                                                                                                                                                                                                                                                                                                                                                                                                                                                                                                                                                                                                                                                                                                                                                                                                                                                                                                                                                                                                                                                                                                                                   |
| TAS/AST   | Trihydroxyarsenite(iii)      | AsH <sub>3</sub> O <sub>3</sub>                    | 125.94           | 11              | 1II0, 1IHU, 1II9, 1SJZ, 1SK0, 1J9B, 6DUN, 1SIJ, 3NVV, 3L4P, 6CZ9                                                                                                                                                                                                                                                                                                                                                                                                                                                                                                                                                                                                                                                                                                                                                                                                                                                                                                                                                                                                                                                                                                                                                                                               |
| ARS       | Arsenic                      | As                                                 | 74.92            | 49              | 1F0J, 1NLX, 1NQ0, 1NQ1, 1NQ2, 1RO6, 1WN6, 1Y0R, 2GBM, 2IA5, 2J4Z, 2JGO, 2O6W, 2XQ4, 2XQ5, 2XQ9, 2Y0O, 3CAO, 3CAR, 3CFS, 3CFV, 3P, 3FRG, 3GWT, 3H6N, 3JRN, 3O56, 3O57, 3SMP, 3SMT, 4DMN, 4FSD, 4GNJ, 4GVM, 4GW6, 4J9T, 4R0V, 5D8Q, 5DAK, 6CX6, 6J05, 6J0E, 6L0C, 6UDN, 7DHY, 7DHZ, 7EDS, 7EEU, 7V97                                                                                                                                                                                                                                                                                                                                                                                                                                                                                                                                                                                                                                                                                                                                                                                                                                                                                                                                                             |
| CAS       | S-(dimethyl arsenic)cysteine | C <sub>5</sub> H <sub>12</sub> AsNO <sub>2</sub> S | 225.14           | 228             | 1BHL, 1FF3, 1FU1, 1FYW, 1FYX, 1I83, 1JQ6, 1R4X, 1RA6, 1RA7, 1S6C, 1TQL, 1ZZS, 1ZZT, 2CJW, 2H77, 2H79, 2HMH, 2HZE, 2ILY, 2ILZ, 2IM0, 2IM1, 2IM2, 2IM3, 2JBH, 2RA8, 2W9J, 3E7S, 3ET6, 3G2F, 3GWS, 3HZF, 3ILZ, 3IMY, 3JZB, 3JZC, 3P4U, 3PSZ, 4AWJ, 4B09, 4B9K, 4BKS, 4BKT, 4C3A, 4CAR, 4CFT, 4CTY, 4CTZ, 4CU0, 4CU1, 4CUL, 4CUM, 4CUN, 4CVG, 4CWV, 4CWW, 4CWX, 4CWY, 4CWZ, 4CX0, 4CX1, 4CX2, 4D34, 4D35, 4D36, 4D37, 4D38, 4D39, 4D3A, 4EG1, 4EG3, 4EG4, 4EG6, 4EG7, 4EG8, 4EGA, 4IKB, 4JQW, 4JSK, 4JSL, 4JSM, 4K5H, 4K5I, 4K5J, 4K5K, 4KCP, 4KCQ, 4KCR, 4KCS, 4L3T, 4LH4, 4LH5, 4LNW, 4LNX, 4LUW, 4MVW, 4MVX, 4MVY, 4MW0, 4MW1, 4MW2, 4MW4, 4MW5, 4MW6, 4MW7, 4MWB, 4MWC, 4MWD, 4MWE, 4NGE, 4NLO, 4NLP, 4NMQ, 4NLR, 4NLS, 4NLT, 4NLU, 4NLV, 4NLW, 4NLX, 4NLY, 4RPU, 4UH7, 4UH8, 4UH9, 4UHA, 4UPQ, 4UPR, 4UPS, 4UPT, 4W9C, 4W9D, 4W9E, 4W9F, 4W9G, 4W9H, 4W9I, 4W9J, 4W9K, 4W9L, 4WP2, 4XA5, 4ZT2, 4ZT3, 4ZT4, 4ZT5, 4ZT6, 4ZT7, 5ADJ, 5ADK, 5ADL, 5ADM, 5ADN, 5BO4, 5BYK, 5CG7, 5DBX, 5FJ2, 5FJ3, 5FVY, 5FVZ, 5GPG, 5HR7, 5LLI, 5N6N, 5NAQ, 5NVV, 5NVW, 5NVX, 5NVY, 5NVZ, 5NW0, 5NW1, 5NW2, 5OI2, 5OI3, 5OI5, 5OI8, 5OIA, 5UOD, 5VV6, 5VV7, 5VV8, 5VV9, 5VVA, 5VVG, 5VVN, 5YV8, 5YV9, 5YVA, 5YVB, 5YVC, 5ZM5, 6B4X, 6B4Z, 6BDP, 6BDR, 6E66, 6EXU, 6FMI, 6FMJ, 6F |

| Ligand ID | Ligand Name | Chemical formulas | Molecular weight | Total No. (902) | PDB ID                                                                                                                          |
|-----------|-------------|-------------------|------------------|-----------------|---------------------------------------------------------------------------------------------------------------------------------|
|           |             |                   |                  |                 | MK,6GFY,6GFZ,6GMN,6GMQ,6GMX,6I4X,6I5J,6I5N,6J6X,6MFE,6UNP,6UUX,6VPH,7A9W,7A9X,7CYS,7M6T,7PVN,8BDI,8BDJ,8BDL,8BDM,8BDN,8BDO,8BV2 |

**Supplementary Table 2** Exploring arsenical protein ids and specified arsenical ligands [As(V)] through data mining: unveiling insights and patterns.

| Ligand ID | Ligand Name                                                                 | Chemical formulas                                                               | Molecular weight | Total No. (902) | PDB ID |
|-----------|-----------------------------------------------------------------------------|---------------------------------------------------------------------------------|------------------|-----------------|--------|
| TTA       | Tetraphenylarsonium                                                         | C <sub>24</sub> H <sub>20</sub> As                                              | 383.34           | 1               | 1HYV   |
| ATS       | γ-arsono-β, γ-methyleneadenosine-5'-diphosphate                             | C <sub>11</sub> H <sub>18</sub> AsN <sub>5</sub> O <sub>12</sub> P <sub>2</sub> | 549.16           | 1               | 1GLJ   |
| LVQ       | Octa-anionic calixarene                                                     | C <sub>38</sub> H <sub>37</sub> AsNaO <sub>25</sub> S <sub>4</sub>              | 1,119.86         | 1               | 6SUV   |
| 1KH       | Arsenoribose                                                                | C <sub>5</sub> H <sub>13</sub> AsO <sub>8</sub>                                 | 276.07           | 1               | 4JD0   |
| ASR       | 4-aminophenylarsonic acid                                                   | C <sub>6</sub> H <sub>8</sub> AsNO <sub>3</sub>                                 | 217.05           | 1               | 1N4F   |
| GK8       | {[(2S)-2-amino-3-(1H-imidazol-5-yl)propyl]oxy}(trihydroxy)-λ <sup>5</sup> - | C <sub>6</sub> H <sub>13</sub> AsN <sub>3</sub> O <sub>4</sub>                  | 266.11           | 1               | 4GK8   |

| Ligand ID   | Ligand Name                                           | Chemical formulas                                                    | Molecular weight | Total No. (902) | PDB ID                                                                                                                                                                                                                                          |
|-------------|-------------------------------------------------------|----------------------------------------------------------------------|------------------|-----------------|-------------------------------------------------------------------------------------------------------------------------------------------------------------------------------------------------------------------------------------------------|
|             | arsanyl                                               |                                                                      |                  |                 |                                                                                                                                                                                                                                                 |
| TTO         | (3,4-dihydroxyphenyl)-triphenylarsonium               | C <sub>24</sub> H <sub>20</sub> AsO <sub>2</sub>                     | 415.34           | 1               | 1HYZ                                                                                                                                                                                                                                            |
| BLJ         | (2S)-2-amino-4-[hydroxy(methyl)arsoryl]butanoic acid  | C <sub>5</sub> H <sub>12</sub> AsNO <sub>4</sub>                     | 225.07           | 1               | 5WPH                                                                                                                                                                                                                                            |
| 3Q7         | (trimethylarsonio) acetate                            | C <sub>5</sub> H <sub>11</sub> AsO <sub>2</sub>                      | 178.06           | 1               | 5NXX                                                                                                                                                                                                                                            |
| T1A         | Tetraethylarsonium ion                                | C <sub>8</sub> H <sub>20</sub> As                                    | 191.17           | 1               | 2BOC                                                                                                                                                                                                                                            |
| 1Y8         | 2-(trimethyl-lambda~5~-arsanyl)ethanol                | C <sub>5</sub> H <sub>14</sub> AsO                                   | 165.09           | 2               | 4LLH, 5NXY                                                                                                                                                                                                                                      |
| A6R         | Arsenoplatin-1                                        | C <sub>4</sub> H <sub>8</sub> AsN <sub>2</sub> O <sub>4</sub><br>Pt  | 418.12           | 4               | 5NJ1, 7BD7, 5NJ7, 6ZS8                                                                                                                                                                                                                          |
| CFQ         | 1-(2-nitrophenyl)-2,2,2-trifluoroethyl]-arsenocholine | C <sub>13</sub> H <sub>19</sub> AsF <sub>3</sub> N<br>O <sub>3</sub> | 369.21           | 3               | 2V96, 2V97, 2V98                                                                                                                                                                                                                                |
| ART/<br>8AR | Arsenate                                              | AsO <sub>4</sub>                                                     | 138.92           | 7               | 1TA4, 3ENZ, 3WE3, 6CZ8, 6XL2, 4F18, 4F19                                                                                                                                                                                                        |
| CSR         | S-arsonocysteine                                      | C <sub>3</sub> H <sub>8</sub> AsNO <sub>5</sub> S                    | 245.09           | 4               | 1OKG, 1SK1, 1LJU, 1JZW                                                                                                                                                                                                                          |
| CAF         | S-dimethylarsinoyl-cysteine                           | C <sub>5</sub> H <sub>12</sub> AsNO <sub>3</sub><br>S                | 241.14           | 48              | 1HYV,1HYZ,1SNG,2C7V,2DYB,2FAU,2IWR,2WTA,2XNQ,3F7D,3LPT,3LPU,4CI1,4E1M,4E1N,4H5U,4ID1,4J8M,4JLH,4O0J,4O55,4O5B,4TSX,5KGW,5KGX,5KRS,5KRT,5MDI,6EB1,6EB2,6LMI,6LMQ,6NNA,6NUJ,6QA0,6SY0,6SYM,6V98,6XGU,6XGV,6XHA,6XHB,7CZY,7D83,7KE0,7WCE,8CT5,8CT7 |

| Ligand ID   | Ligand Name    | Chemical formulas                              | Molecular weight | Total No. (902) | PDB ID                                                                                                                                                                                                                                                                                                                                                                                                                                                                                                                                                                                                                                                                                                                                                                                                                                                                                                                                                                                                                                                                                                                                                                                                                                                                                                                                                                                                                                                                                                                                                                                                                                                                  |
|-------------|----------------|------------------------------------------------|------------------|-----------------|-------------------------------------------------------------------------------------------------------------------------------------------------------------------------------------------------------------------------------------------------------------------------------------------------------------------------------------------------------------------------------------------------------------------------------------------------------------------------------------------------------------------------------------------------------------------------------------------------------------------------------------------------------------------------------------------------------------------------------------------------------------------------------------------------------------------------------------------------------------------------------------------------------------------------------------------------------------------------------------------------------------------------------------------------------------------------------------------------------------------------------------------------------------------------------------------------------------------------------------------------------------------------------------------------------------------------------------------------------------------------------------------------------------------------------------------------------------------------------------------------------------------------------------------------------------------------------------------------------------------------------------------------------------------------|
| CAC/<br>CAD | Cacodylate ion | C <sub>2</sub> H <sub>6</sub> AsO <sub>2</sub> | 136.99           | 518             | 1D0C,1D0O,1D1V,1D1W,1D1X,1D1Y,1ED4,1ED5,1ED6,3JWW,3JWX,3JWY,3JWZ,3N5P,3N5Q,3N5R,3N5S,3N5T,3N67,3N68,3N69,3N6A,3N6B,3N6C,3N6D,3N6E,3N6F,3N6G,3NLD,3NLE,3NLF,3NLG,3NLH,3NLI,3NLT,3NLU,3PNH,3RQO,3RQP,3S2S,3TO7,3TO9,4IMX,4UHF,4UHH,4ZDQ,5NSE,5VV8,5WHI,5YGE,6NSE,7CW1,7CY3,7CY9,7CZ0,7EA4,7MDP,7NSE,7SXP,8NSE,9NSE,1B92,1B9D,1B9F,1BEH,1BIZ,1C82,1D1S,1D1T,1D61,1DAN,1DM6,1DM7,1DM8,1DMI,1DMJ,1DMK,1DVA,1EQZ,1F35,1FE8,1FOI,1FOJ,1FOL,1FOO,1FOP,1GQ8,1GR0,1I19,1I9S,1I9T,1ITG,1JOD,1K2O,1KZM,1L0I,1L1D,1LZK,1MWQ,1N0Y,1NSE,1NW2,1OAR,1OB1,1P13,1P6L,1P6M,1P6N,1PQU,1Q2O,1QG3,1QH3,1QQJ,1R4V,1RS8,1RS9,1TAD,1TND,1TR7,1TYE,1TZA,1VHD,1VHO,1W0Y,1W2K,1WMB,1WN5,1WY2,1X1T,1XSL,1XZX,1Y0X,1Y9A,1YHC,1Z6B,1ZV8,2A2T,2ACR,2AEI,2AVJ,2B0P,2BO2,2BOQ,2BOU,2BOX,2BVT,2BVY,2D28,2.00E+11,2G6O,2GWN,2GWS,2H5K,2HX2,2HYP,2I0K,2IUC,2IYO,2J13,2J6E,2JFS,2NSE,2O4M,2O4Q,2OUI,2PQ3,2RL7,2V5C,2VDK,2VDL,2VEQ,2VQG,2VQH,2VQK,2VQL,2VS0,2VW8,2WA7,2X2O,2X2P,2X2Q,2XFV,2XOD,2XOE,2XZ1,2Z3I,2Z3J,3A6E,3A6F,3AAL,3BFD,3BFT,3BWW,3CS2,QS,QT,UE,3.00E+38,3ERP,3FCU,3FJU,3FKG,3FM4,3FMU,3FPC,3FPL,3G3S,3GH3,3GK1,3GK2,3GSK,3H6T,3HBZ,3HTW,3I3O,3I7D,3IUW,3KP2,3KP6,3KZP,3LLM,3M1R,3MDO,3MSZ,3N5F,3NRF,3NSE,3OD5,3OOU,3P85,3PB6,3PD8,3PQS,3RF3,3RHG,3S70,3SSG,3UCY,3UJP,3VFJ,3VP5,3W86,3W87,3W88,3WAB,3WC5,3WGH,3ZPG,4C2A,4D7L,4GY1,4H5U,4HG3,4HG5,4HGD,4HX2,4ICR,4IIS,4J5G,4K4G,4K4I,4KVH,4LCZ,4MOU,4N07,4N4R,4NSE,4OJR,4OSG,4PBE,4PBF,4PCP,4PI2,4PIV,4PTX,4RLR,4RYN,4U2V,4UFC,4UM8,4V2X,4W7U,4WB0,4WXB,4WY0,4X0L,4XAF,4XAG,4XAY,4XD3,4XD4,4XD5,4XD6,4XOE,4XWF,4YN5,4Z3N,4Z3P,4ZMA,4ZNG,5AG0,5AG1,5AOS,5AOT,5CB6,5CNX,5.00E+29,5.00E+64,5.00E+66,5.00E+93,5ED4,5EZ3,5GM3,5H8S,5HLO,5HRN,5HRP,5HRR |

| Ligand ID | Ligand Name | Chemical formulas | Molecular weight | Total No. (902) | PDB ID                                                                                                                                                                                                                                                                                                                                                                                                                                                                                                                                                                                                                                                                                                                                                                                                                                                                                                                                                                                                                                   |
|-----------|-------------|-------------------|------------------|-----------------|------------------------------------------------------------------------------------------------------------------------------------------------------------------------------------------------------------------------------------------------------------------------------------------------------------------------------------------------------------------------------------------------------------------------------------------------------------------------------------------------------------------------------------------------------------------------------------------------------------------------------------------------------------------------------------------------------------------------------------------------------------------------------------------------------------------------------------------------------------------------------------------------------------------------------------------------------------------------------------------------------------------------------------------|
|           |             |                   |                  |                 | ,5HRS,5HWA,5HXD,5IC5,5J39,5JH9,5K6Z,5KEK,5KEO,5LMC,5LTA,5M11,5NT5,5O3X,5O4E,5O8X,5OC4,5OYJ,5T5K,5UW3,5UW5,5VG2,5VT3,5W0R,5W6B,5WCP,5WCQ,5WCR,5WCW,5WIZ,5WJ0,5WMS,5XKO,5XRS,5XRT,5XTU,5ZEQ,5ZVA,5ZVB,6AML,6B4W,6BH7,6BHL,6CXZ,6D8P,6EZV,6GBL,6H2P,6HMF,6JCF,6JCG,6JP4,6KBL,6M0U,6N6Q,6PI4,6QM3,6QPH,6RCQ,6RCX,6SA0,6SJD,6U40,6UNW,6V6R,6WQG,6WR3,6WR5,6WR9,6WRB,6WRI,6WSN,6WSO,6WSP,6WSQ,6WSS,6WST,6WSU,6WSW,6WSY,6WSZ,6X6D,6X8B,6X8C,6X91,6XCO,6XDV,6XDW,6XDX,6XDZ,6XEI,6XEJ,6XEL,6XEM,6XFC,6XFD,6XFE,6XFG,6XFW,6XFY,6XFZ,6XG0,6XGJ,6XGK,6XGL,6XNA,6XO5,6XO6,6XO7,6XO9,6XU0,6XUP,6YAB,6YPE,6YPX,6Z3X,6ZYU,7BB8,7CZ0,7EQ2,7F6U,7FE0,7FE5,7JFT,7JHA,7JHB,7JHC,7JHR,7JHS,7JHT,7JI5,7JI6,7JI7,7JI8,7JI9,7JIM,7JIN,7JIP,7JJ2,7JJ3,7JJ4,7JJ5,7JJ6,7JJU,7JJX,7JJY,7JK0,7JKD,7JKE,7JKG,7JKH,7JKJ,7JKK,7JL9,7JLA,7JLB,7JLD,7JLF,7JNJ,7JNK,7JNL,7JNM,7JOG,7JOI,7JOJ,7JOK,7JOL,7JON,7JP5,7JP6,7JP7,7JP9,7JPB,7JRY,7JRZ,7JS0,7JSB,7JSC,7JVB,7KG1,7KG8,7L2C,7LHK,7MDB,7NRP,7OI1,7Q2U,7QUG,7R3F,7RP2,7RVI,7S6U,7TP3,7XBM,8CYF,8D59,8D5B,8D6T,8EGW,8OEK |

**Supplementary Table 3** Statistical information on the interactions between the top 10 amino acids with arsenic. Multiple modes were generated for each amino acid's functional groups or side residues, of which only the first ones for each have been mentioned (<sup>a</sup>Mode). The statistical parameters such as SE - standard error; SD – standard deviation; Mini – minimum bond length; Max – maximum bond length; Bond – peak bond length and frequency are also shown.

| Amino Acids | Side Groups | Mean | SE    | Median | <sup>a</sup> Mode | SD    | Range(Å) | Mini(Å) | Max(Å) | Bond(Å) | Frequency |
|-------------|-------------|------|-------|--------|-------------------|-------|----------|---------|--------|---------|-----------|
| Cys         | SG          | 3.05 | 0.144 | 3.10   | 1.90              | 0.629 | 2.10     | 1.90    | 4.00   | 2.4     | 80        |
|             | O           | 3.45 | 0.104 | 3.45   | 2.90              | 0.361 | 1.10     | 2.90    | 4.00   | 3.6     | 08        |
|             | N           | 3.65 | 0.087 | 3.65   | 3.30              | 0.245 | 0.70     | 3.30    | 4.00   | 3.5     | 16        |
| Glu         | OE          | 3.05 | 0.144 | 3.10   | 1.90              | 0.629 | 2.10     | 1.90    | 4.00   | 3.6     | 55        |
| Asp         | OD          | 3.05 | 0.144 | 3.10   | 1.90              | 0.629 | 2.10     | 1.90    | 4.00   | 4.0     | 39        |
| Ser         | HA          | 3.05 | 0.144 | 3.10   | 1.90              | 0.629 | 2.10     | 1.90    | 4.00   | 3.0     | 12        |
|             | OG          | 3.05 | 0.144 | 3.10   | 1.90              | 0.629 | 2.10     | 1.90    | 4.00   | 3.8     | 32        |
| Arg         | NH          | 3.29 | 0.121 | 3.30   | 2.50              | 0.469 | 1.50     | 2.50    | 4.00   | 3.7     | 28        |
| Asn         | ND          | 3.55 | 0.096 | 3.55   | 3.10              | 0.303 | 0.90     | 3.10    | 4.00   | 3.8     | 18        |
|             | OD          | 3.40 | 0.108 | 3.40   | 2.80              | 0.389 | 1.20     | 2.80    | 4.00   | 3.5     | 23        |
| Pro         | N           | 3.75 | 0.065 | 3.75   | 3.60              | 0.129 | 0.30     | 3.60    | 3.90   | 3.7     | 19        |
| His         | ND          | 3.34 | 0.115 | 3.35   | 2.60              | 0.431 | 1.40     | 2.60    | 4.00   | 4.0     | 08        |
|             | NE          | 3.29 | 0.121 | 3.30   | 2.50              | 0.469 | 1.50     | 2.50    | 4.00   | 3.8     | 17        |
|             | O           | 3.80 | 0.071 | 3.80   | 3.60              | 0.158 | 0.40     | 3.60    | 4.00   | 3.9     | 20        |
| Tyr         | OH          | 3.45 | 0.104 | 3.45   | 2.90              | 0.361 | 1.10     | 2.90    | 4.00   | 3.8     | 21        |
|             | O           | 3.45 | 0.104 | 3.45   | 2.90              | 0.361 | 1.10     | 2.90    | 4.00   | 3.7     | 03        |
| Ala         | O           | 3.40 | 0.100 | 3.40   | 2.90              | 0.332 | 1.00     | 2.90    | 3.90   | 3.6     | 20        |

**Supplementary Table 4** Raman bands and assignments for cysteine and its arsenic complex in the spectral region of 150-3000 cm<sup>-1</sup> in solid and solution form. In this current study, the Raman peaks are assigned based on the literature of Teixeira *et al.*, 2007; Zhu *et al.*, 2011; Freire *et al.*, 2017.

| Cys | Cys Solution | CysAsIII Precipitate | CysAsV Precipitate |
|-----|--------------|----------------------|--------------------|
|-----|--------------|----------------------|--------------------|

| Raman Shift (cm <sup>-1</sup> ) | Assignments Based on Literature          | Raman Shift (cm <sup>-1</sup> ) | Assignments Based on Literature          | Raman Shift (cm <sup>-1</sup> ) | Assignments Based on Literature          | Raman Shift (cm <sup>-1</sup> ) | Assignments Based on Literature          |
|---------------------------------|------------------------------------------|---------------------------------|------------------------------------------|---------------------------------|------------------------------------------|---------------------------------|------------------------------------------|
| 209                             | CH <sub>2</sub> -CH tor                  | 261, 303                        | CH <sub>2</sub> -CH-CO <sub>2</sub> bend | 227                             | CH <sub>2</sub> -CH tor                  | 237                             | CH <sub>2</sub> -CH tor                  |
| 264                             | NH <sub>2</sub> tor                      | 351                             | S-H out of the plane bend                | 285                             | CH <sub>2</sub> -CH-CO <sub>2</sub> bend | 266                             | S-H out of the plane bend                |
| 294                             | CH <sub>2</sub> -CH-CO <sub>2</sub> bend | 461, 493                        | H <sub>2</sub> O                         | 354, 381, 396, 424              | As-S str                                 | 300                             | CH <sub>2</sub> -CH-CO <sub>2</sub> bend |
| 360                             | S-H out of the plane bend                | 525                             | CH <sub>2</sub> -CH-N bend               | 496                             | CH <sub>2</sub> -CH-N str                | 332, 375, 389                   | As-S str                                 |
| 439                             | CH <sub>2</sub> -CH-CO <sub>2</sub> bend | 614                             | S-S asy str                              | 530, 541                        | S-S str                                  | 480                             | NH <sup>3+</sup> tor                     |
| 536                             | CH <sub>2</sub> -CH-N bend               | 686, 776                        | C-S str                                  | 603                             | As-O                                     | 510                             | S-S asy                                  |
| 640                             | CH-CO <sub>2</sub> str                   | 812                             | CH <sub>2</sub> rock                     | 660                             | CH-CO <sub>2</sub> str                   | 563                             | NH <sup>3+</sup> tor                     |
| 688                             | C-S str                                  | 872                             | CO <sub>2</sub> sci                      | 670, 692, 709                   | C-S str                                  | 605, 640                        | CH-CO <sub>2</sub> str                   |
| 767                             | CH <sub>2</sub> rock                     | 937                             | N-CH str                                 | 784, 2920                       | CH <sub>2</sub> rock                     | 670, 688                        | C-S str                                  |
| 815, 870                        | CO <sub>2</sub> sci                      | 991                             | CH <sub>2</sub> -CH str                  | 809, 821, 839, 877              | CO <sub>2</sub> sci                      | 771                             | CH <sub>2</sub> rock                     |
| 937                             | N-CH str                                 | 1063                            | S-H in-plane bend                        | 918, 937                        | C-C str                                  | 843                             | CO <sub>2</sub> sci                      |
| 1003                            | CH <sub>2</sub> -CH str                  | 1099                            | CH <sub>2</sub> twist                    | 963                             | N-CH str                                 | 997                             | CH <sub>2</sub> -CH                      |
| 1058, 1064                      | S-H in plane bend                        | 1141                            | NH <sup>3+</sup> rock                    | 1066                            | S-H plane bend                           | 1056                            | S-H in-plane bend                        |
| 1107, 1137                      | NH <sup>3+</sup> rock                    | 1212, 1266                      | CH <sub>2</sub> twist                    | 1104, 1138                      | NH <sub>3</sub> rock                     | 1205                            | CH <sub>2</sub> twist                    |
| 1197                            | CH <sub>2</sub> twist                    | 1308                            | C-H bend                                 | 1201, 1227, 1252                | CH <sub>2</sub> twist                    | 1299                            | C-H bend                                 |
| 1294                            | C-H bend                                 | 1351                            | CO <sub>2</sub> asy str                  | 1307                            | C-H bend                                 | 1347                            | CO <sub>2</sub> asy str                  |
| 1343, 1392                      | CO <sub>2</sub> asy str                  | 1398, 1428                      | CH <sub>2</sub> sci                      | 1349                            | CO <sub>2</sub> asy str                  | 1406                            | CH <sub>2</sub> sci                      |
| 1422                            | CH <sub>2</sub> sci                      | 1637                            | NH <sub>3</sub> asy bend                 | 1396                            | C-N str                                  | 2548, 2552                      | S-H str                                  |
| 2550                            | S-H str                                  | 2557                            | S-H str                                  | 1413, 1421                      | CH <sub>2</sub> sci                      | 2958, 2920                      | N-H str                                  |
| 2963                            | N-H str                                  | 2954, 3097                      | N-H str                                  | 1497                            | CH <sub>2</sub> /OH bend                 | 2961                            | CH <sub>2</sub> sym str                  |
| 2993                            | C-H str                                  | 3001                            | C-H str                                  | 1552, 1599, 2953,               | NH <sub>3</sub> asy bend                 | -                               | -                                        |



---

| <b>Cys</b> | <b>Cys Solution</b> | <b>CysAsIII Precipitate</b> | <b>CysAsV Precipitate</b> |
|------------|---------------------|-----------------------------|---------------------------|
|------------|---------------------|-----------------------------|---------------------------|

---

2964

---

**Supplementary Table 5** Raman bands and assignments for glutamic acid and its arsenic complex in the spectral region of 150-3000  $\text{cm}^{-1}$  in solid and solution form. In this current study, the Raman peaks are assigned based on the literature of Teixeira *et al.*, 2007; Zhu *et al.*, 2011; Freire *et al.*, 2017.

| <b>Glu</b>                                           |                                                | <b>Glu Solution</b>                                  |                                                | <b>GluAsIII Solution</b>                             |                                                | <b>GluAsV Solution</b>                               |                              |
|------------------------------------------------------|------------------------------------------------|------------------------------------------------------|------------------------------------------------|------------------------------------------------------|------------------------------------------------|------------------------------------------------------|------------------------------|
| <b>Raman Shift<br/>(<math>\text{cm}^{-1}</math>)</b> | <b>Assignments<br/>Based on<br/>Literature</b> | <b>Raman Shift<br/>(<math>\text{cm}^{-1}</math>)</b> | <b>Assignments<br/>Based on<br/>Literature</b> | <b>Raman Shift<br/>(<math>\text{cm}^{-1}</math>)</b> | <b>Assignments<br/>Based on<br/>Literature</b> | <b>Raman Shift<br/>(<math>\text{cm}^{-1}</math>)</b> | <b>Assignments</b>           |
| 244, 280, 315,<br>385                                | CCC bend                                       | 232                                                  | CCC bend                                       | 223                                                  | CCC bend                                       | 225                                                  | CCC bend                     |
| 461                                                  | COO <sup>-</sup> rock                          | 307                                                  | CCC bend                                       | 296                                                  | CCC bend                                       | 300                                                  | CCC bend                     |
| 498                                                  | C=O rock                                       | 444                                                  | C=N bend                                       | 357                                                  | CCC bend                                       | 369                                                  | CCC bend                     |
| 536                                                  | C=O out of plane<br>deform                     | 490                                                  | C=O rock                                       | 413                                                  | CCC bend                                       | 405                                                  | CCC bend                     |
| 574                                                  | COO <sup>-</sup> rock                          | 588                                                  | C=O bend                                       | 486                                                  | COO <sup>-</sup> bend                          | 487                                                  | C=O out of<br>plane bend     |
| 706                                                  | NH <sub>2</sub> wagg                           | 657                                                  | CCC bend                                       | 554                                                  | C=O out<br>plane bend                          | 516                                                  | C=O out of the<br>plane bend |
| 758                                                  | COOH wagg                                      | 680                                                  | NH <sub>2</sub> wagg                           | 590                                                  | C=O bend                                       | 575                                                  | C=O bend                     |
| 800                                                  | CH <sub>2</sub> rock/C-COO<br>str/COOH bend    | 757                                                  | NH <sub>2</sub> wagg                           | 702                                                  | As-O str                                       | 601                                                  | C-H out of<br>plane          |
| 863                                                  | C-C str/CH <sub>2</sub><br>wagg/COOH<br>bend   | 793                                                  | NH <sub>2</sub> wagg                           | 805                                                  | NH <sub>2</sub> rock                           | 640                                                  | C=O bend                     |
| 890, 965, 1062                                       | CC str                                         | 854                                                  | CC str                                         | 855                                                  | CH <sub>2</sub> rock                           | 670                                                  | NH <sub>2</sub> wagg         |
| 916                                                  | C-C-N str                                      | 899                                                  | COOH<br>deform                                 | 928                                                  | OH bend                                        | 738                                                  | As-O str                     |
| 937                                                  | COO- deform                                    | 915                                                  | CCN str                                        | 996                                                  | CC str                                         | 781                                                  | CC str                       |
| 996                                                  | NH <sup>3+</sup> wagg                          | 939                                                  | COO- def                                       | 1069                                                 | CC str                                         | 872                                                  | As-O str                     |
| 1084, 1128                                           | NH <sup>3+</sup> rock                          | 1001, 1026,<br>1067                                  | CC str                                         | 1198                                                 | NH <sub>2</sub> twist                          | 921                                                  | OH bend                      |
| 1208                                                 | CO str                                         | 1097                                                 | CN str                                         | 1345                                                 | CH <sub>2</sub> wagg                           | 970, 1000, 1072                                      | CC str                       |
| 1248, 1270                                           | CH <sub>2</sub> twist                          | 1204                                                 | NH <sub>2</sub> twist                          | 1413                                                 | CN str                                         | 1192                                                 | NH <sub>2</sub> twist        |

|            |                          |            |                       |      |                       |            |                       |
|------------|--------------------------|------------|-----------------------|------|-----------------------|------------|-----------------------|
| 1305       | CH <sub>2</sub> wagg     | 1294       | CH <sub>2</sub> twist | 1633 | H <sub>2</sub> O bend | 1258, 1287 | CH <sub>2</sub> twist |
| 1350, 1433 | CH <sub>2</sub> deform   | 1401       | CN str                | 3149 | NH <sub>2</sub> str   | 1314, 1349 | CH <sub>2</sub> wagg  |
| 1407       | COO <sup>-</sup> sym str | 1636       | H <sub>2</sub> O bend |      |                       | 1411       | CN str                |
| 1482       | CH <sup>3+</sup> deform  | 3063, 3156 | NH <sub>2</sub> str   |      |                       | 1634       | H <sub>2</sub> O bend |
| 2928, 2970 | CH <sub>2</sub> str      |            |                       |      |                       | 3137       | NH <sub>2</sub> bend  |

**Supplementary Table 6** Raman bands and assignments for aspartic acid and its arsenic complex in the spectral region of 150-3000 cm<sup>-1</sup> in solid and solution form. In this current study, the Raman peaks are assigned based on the literature of Teixeira *et al.*, 2007; Zhu *et al.*, 2011; Freire *et al.*, 2017.

| Asp                             |                                                               | Asp Solution                    |                                         | AspAsIII Solution               |                                                               | AspAsV Solution                 |                                           |
|---------------------------------|---------------------------------------------------------------|---------------------------------|-----------------------------------------|---------------------------------|---------------------------------------------------------------|---------------------------------|-------------------------------------------|
| Raman Shift (cm <sup>-1</sup> ) | Assignments Based on Literature                               | Raman Shift (cm <sup>-1</sup> ) | Assignments Based on Literature         | Raman Shift (cm <sup>-1</sup> ) | Assignments Based on Literature                               | Raman Shift (cm <sup>-1</sup> ) | Assignments Based on Literature           |
| 187, 244, 266                   | CCC bend                                                      | 223, 288                        | CCC bend                                | 229                             | CCC bend                                                      | 208                             | NH <sub>3</sub> twist                     |
| 356, 552                        | CCN bend/CO <sub>2</sub> <sup>-</sup> bend                    | 483, 599                        | COOH bend                               | 369                             | CCN bend/COOH bend                                            | 249                             | CCC bend                                  |
| 412, 462, 776                   | CO <sub>2</sub> <sup>-</sup> bend                             | 669                             | CO <sub>2</sub> bend/HOCC rock/CCN bend | 484                             | OH rock                                                       | 335                             | CCN bend/CO <sub>2</sub> <sup>-</sup> str |
| 597, 658                        | CO <sub>2</sub> <sup>-</sup> bend/HOCC rock                   | 989                             | CC str/CCC bend/CO str                  | 702                             | As-OH str                                                     | 369                             | CCN bend/COOH bend                        |
| 743                             | CO <sub>2</sub> bend/ HOCC rock/COOH bend                     | 1059                            | CN str/CC str                           | 781                             | OCO <sup>-</sup> rock                                         | 397                             | OH rock                                   |
| 872                             | CC str/CH <sub>2</sub> rock/CO <sub>2</sub> <sup>-</sup> bend | 1080                            | CN str/CC str                           | 865                             | CC str/CH <sub>2</sub> rock/CO <sub>2</sub> <sup>-</sup> bend | 511                             | As-O str                                  |
| 900                             | CH <sub>2</sub> rock/CC str/CN str                            | 1104                            | CH str/NH <sup>3+</sup> rock            | 984                             | CC str/CCC bend/CO str                                        | 559                             | As-O str                                  |
| 938                             | CH str                                                        | 1150                            | NH <sup>3+</sup> rock/CH bend/CO str    | 1155                            | NH <sup>3+</sup> rock/CH bend/CO str                          | 663                             | CO <sub>2</sub> str/HOCC rock/CCN bend    |
| 988                             | CC str/CCC bend/CO str                                        | 1222                            | CO str/OH bend/CC str                   | 1192                            | CH str/NH <sup>3+</sup> rock/CC str/CO str                    | 2926                            | CH str                                    |
| 1078                            | CN str/CC str                                                 | 1356                            | CC str/CH, OH                           | 1223                            | CO str/OH                                                     | 736                             | CO <sub>2</sub> str/HOCC                  |

|                     |                                                          |            |                                                       |               |                                                                    |      |                                                       |
|---------------------|----------------------------------------------------------|------------|-------------------------------------------------------|---------------|--------------------------------------------------------------------|------|-------------------------------------------------------|
| 1117, 1250,<br>1332 | CH str/NH <sup>3+</sup> rock                             | 1407       | bend/CH <sub>2</sub> wag<br>OH bend/CO<br>str/C=O str | 1324          | bend/CC str<br>CH str/CH <sub>2</sub><br>wag/NH <sup>3+</sup> rock | 995  | rock/COOH str<br>CC str/CCC<br>bend/CO str            |
| 1141                | NH <sup>3+</sup> rock/CH,<br>CH <sub>2</sub> bend/CO str | 1633       | H <sub>2</sub> O bend                                 | 1351          | CC str/CH, OH<br>bend/CH <sub>2</sub> wag                          | 1057 | CN str/CC str                                         |
| 1286, 1419          | C=O str                                                  | 1073, 1104 | CN str/CC str                                         | 1642          | H <sub>2</sub> O bend                                              | 1337 | CH bend/CH <sub>2</sub><br>wagg/NH <sup>3+</sup> rock |
| 1505, 2952,<br>2995 | C=C str, CH <sub>2</sub> str                             | 3064, 3140 | NH <sup>3+</sup> str                                  | 3049,<br>3150 | NH <sup>3+</sup> str                                               | 1414 | OH bend/CO<br>str/C=O str                             |

**Supplementary Table 7** Raman bands and assignments for serine and its arsenic complex in the spectral region of 150-3000 cm<sup>-1</sup> in solid and solution form. In this current study, the Raman peaks are assigned based on the literature of Teixeira *et al.*, 2007; Zhu *et al.*, 2011; Freire *et al.*, 2017.

| Ser                             |                                 | Ser Solution                    |                                    | SerAsIII Solution               |                                 | SerAsV Solution                 |                                 |
|---------------------------------|---------------------------------|---------------------------------|------------------------------------|---------------------------------|---------------------------------|---------------------------------|---------------------------------|
| Raman Shift (cm <sup>-1</sup> ) | Assignments Based on Literature | Raman Shift (cm <sup>-1</sup> ) | Assignments Based on Literature    | Raman Shift (cm <sup>-1</sup> ) | Assignments Based on Literature | Raman Shift (cm <sup>-1</sup> ) | Assignments Based on Literature |
| 259                             | CCN bend                        | 297                             | CCN bend                           | 292                             | CCC bend                        | 289                             | CCC bend                        |
| 291                             | CCC bend                        | 369                             | Skel 2                             | 375, 431                        | Skel 2                          | 383                             | Skel 2                          |
| 357                             | NCC bend                        | 404                             | Skel 1                             | 491                             | NH <sup>3+</sup> twist          | 422                             | Skel 1                          |
| 416                             | CH <sub>2</sub> bend            | 491                             | NH <sub>3</sub> <sup>+</sup> twist | 591                             | COO <sup>-</sup> wagg           | 488                             | NH <sup>3+</sup> twist          |
| 509, 807                        | COO <sup>-</sup> rock           | 532, 554                        | COO <sup>-</sup> wagg              | 664                             | COO <sup>-</sup> bend           | 571                             | COO <sup>-</sup> rock           |
| 568                             |                                 | 586                             | COO <sup>-</sup> rock              | 702                             | As-OH str                       | 654                             | COO <sup>-</sup> bend           |
| 606                             | COO <sup>-</sup> bend           | 593, 602, 673                   | COO <sup>-</sup> bend              | 807                             | COO <sup>-</sup> rock           | 709                             | CH <sub>2</sub> rock            |
| 644                             | CH-CO <sub>2</sub> str          | 711                             | CH <sub>2</sub> rock               | 854                             | CH <sub>2</sub> rock/CC<br>str  | 842                             | CD <sub>2</sub> twist           |
| 851, 916                        | CC str                          | 805                             | COO <sup>-</sup> str               | 980                             | CN str                          | 908                             | CC str                          |
| 965                             | CH <sub>2</sub> rock            | 839                             | CD <sub>2</sub> twist              | 1047                            | CO str                          | 980                             | CN str                          |
| 1003                            | CN str                          | 887                             | CH <sub>2</sub> rock/CC str        | 1142                            | NH <sup>3+</sup> rock           | 1058                            | CO str                          |
| 1051                            | CH <sub>2</sub>                 | 940                             | CD <sub>2</sub> wagg               | 1243                            | COH bend                        | 1085                            | NH <sup>3+</sup> rock           |
| 1089                            | CO str                          | 963, 1030                       | CO str                             | 1349                            | C-H bend                        | 1130                            | NH <sup>3+</sup> rock           |

|            |                                  |            |                                  |      |                              |      |                          |
|------------|----------------------------------|------------|----------------------------------|------|------------------------------|------|--------------------------|
| 1127       | OH bend                          | 989        | CN str                           | 1408 | COO <sup>-</sup> asy str     | 1157 | CH <sub>2</sub> twist    |
| 1214       | CO str/CH <sub>2</sub> twist     | 1081, 1111 | NH <sup>3+</sup> rock            | 1467 | CH <sub>2</sub> bend         | 1190 | COH bend                 |
| 1318       | CO                               | 1147, 1470 | CH <sub>2</sub> twist            | 1632 | NH <sup>3+</sup> aym<br>bend | 1301 | CH <sub>2</sub> wagg     |
| 1415       | COO <sup>-</sup> asy str         | 1241       | COH bend                         | 3120 | NH <sup>3+</sup> aym str     | 1345 | CH <sub>2</sub> wagg     |
| 1464       | CH <sub>2</sub> bend             | 1284, 1348 | CH rock                          |      |                              | 1406 | COO <sup>-</sup> asy str |
| 1529       | CC str                           | 1312       | CH <sub>2</sub> wagg             |      |                              | 1467 | CH <sub>2</sub> bend     |
| 1605, 1627 | NH <sup>3+</sup> antisym<br>bend | 1402       | COO <sup>-</sup> sym             |      |                              | 1633 | HOH bend                 |
| 1687, 1779 | C=O str                          | 1634       | NH <sup>3+</sup> antisym<br>bend |      |                              | 3130 | NH <sup>3+</sup> aym str |
| 2958, 2995 | CH <sub>2</sub> sym. Str         | 3038, 3140 | NH <sup>3+</sup> asym str        |      |                              |      |                          |

**Supplementary Table 8** Raman bands and assignments for arginine and its arsenic complex in the spectral region of 300-3000  $\text{cm}^{-1}$  in solid and solution form. In this current study, the Raman peaks are assigned based on the literature of Teixeira *et al.*, 2007; Zhu *et al.*, 2011; Freire *et al.*, 2017.

| Arg                              |                                                       | Arg Solution                     |                                                       | ArgAsIII Solution                |                                                           | ArgAsV Solution                  |                                                       |
|----------------------------------|-------------------------------------------------------|----------------------------------|-------------------------------------------------------|----------------------------------|-----------------------------------------------------------|----------------------------------|-------------------------------------------------------|
| Raman Shift ( $\text{cm}^{-1}$ ) | Assignments Based on Literature                       | Raman Shift ( $\text{cm}^{-1}$ ) | Assignments Based on Literature                       | Raman Shift ( $\text{cm}^{-1}$ ) | Assignments Based on Literature                           | Raman Shift ( $\text{cm}^{-1}$ ) | Assignments Based on Literature                       |
| 306                              | CCC bend                                              | 343                              | CCC bend                                              | 357                              | CCC bend                                                  | 333, 391                         | As-O str                                              |
| 357                              | NCC bend                                              | 411, 486, 1412                   | $\text{CO}_2$ bend                                    | 399                              | $\text{CO}_2$ bend                                        | 489                              | $\text{CO}_2$ bend                                    |
| 488                              | $\text{CO}_2$ bend                                    | 597                              | NCN bend                                              | 490, 3167                        | $\text{NH}_3^+$ twist                                     | 596                              | NCN bend                                              |
| 570, 610                         | NCN bend                                              | 665, 1442                        | $\text{CH}_2$ wagg                                    | 544, 589                         | NCN bend                                                  | 681                              | $\text{CH}_2$ rock                                    |
| 648                              | CCO bend                                              | 781, 804, 879                    | $\text{CO}_2$ / $\text{CH}_2$ rock                    | 578, 653, 672                    | $\text{COO}^-$ rock                                       | 831                              | As-OH str                                             |
| 752, 792                         | $\text{CH}_2$ rock                                    | 834, 855, 899                    | CC str/ $\text{CH}_2$ rock                            | 702                              | As-OH str                                                 | 897                              | $\text{CH}_2$ rock/CC str                             |
| 847, 874, 918                    | CC str/ $\text{CH}_2$ rock                            | 981                              | NCN str/CN asy str/CN str/CC str                      | 730, 789, 858                    | $\text{CO}_2$ wagg/ $\text{CH}_2$ str                     | 930, 1081                        | NC str/CC str/ $\text{CH}_2$ rock/ $\text{NH}_2$ wagg |
| 978, 1029                        | NCN str/CN asy str/CN str/CC str                      | 1058                             | CC str/ $\text{NH}_2$ twist                           | 898                              | CC str/ $\text{CH}_2$ rock                                | 979                              | NCN str/CN sym str/CN str/CC str                      |
| 1068                             | CC str/ $\text{NH}_2$ twist                           | 1081                             | $\text{NH}_2$ twist/ $\text{NH}_2$ rock/CC str/NC str | 930, 1076                        | NC str/CC str/ $\text{CH}_2$ rock/ $\text{NH}_2$ wagg     | 1176                             | $\text{NH}_2$ wagg/NC str                             |
| 1096, 1379, 1472                 | $\text{NH}_2$ twist/ $\text{NH}_2$ rock/CC str/NC str | 1186                             | $\text{NH}_2$ wagg/NC str                             | 980                              | NCN str/CN sym str/CC                                     | 1212                             | $\text{NH}_3$ deform                                  |
| 1121                             | OH bend                                               | 1218                             | $\text{NH}_3^+$ deform                                | 1136                             | $\text{NH}_3^+$ rock/ $\text{CH}_2$ bend/ $\text{CO}$ str | 1311                             | $\text{CH}_2$ bend                                    |
| 1189                             | $\text{NH}_2$ wagg/NC str                             | 1311                             | $\text{CH}_2$ bend                                    | 1173                             | $\text{NH}_2$ wagg/NC str                                 | 1361                             | $\text{COO}^-$ motion                                 |
| 1258, 1299                       | $\text{NH}_3^+$ deform                                | 1358                             | $\text{CH}_2$ bend/ $\text{COO}^-$ mot                | 1284, 1409                       | C=O str                                                   | 1411                             | $\text{COO}^-$ asym str/ $\text{CH}_2$ deform         |
| 1327, 2863,                      | $\text{CH}_2$ bend                                    | 1470                             | NCN asy str/CNH                                       | 1312, 1361                       | $\text{CH}_2$ bend                                        | 1442                             | $\text{COO}^-$ str/CC                                 |

|                     |                                                              |      |                                                          |      |                                                                      |      |                                              |
|---------------------|--------------------------------------------------------------|------|----------------------------------------------------------|------|----------------------------------------------------------------------|------|----------------------------------------------|
| 2914                |                                                              |      | bend/ CH <sub>2</sub> wagg                               |      |                                                                      |      | str/NH <sub>2</sub> /CH <sub>2</sub><br>wagg |
| 1432                | COO str/CC str/NH <sub>2</sub><br>twist/CH <sub>2</sub> wagg | 1635 | CO <sub>2</sub> /<br>NH <sup>3+</sup> / H <sub>2</sub> O | 1442 | CO <sub>2</sub> str/CC<br>str/NH <sub>2</sub> /CH <sub>2</sub> twist | 1635 | H <sub>2</sub> O bend                        |
| 1553, 1582,<br>1622 | COO- aym str                                                 | 3149 | NH <sup>3+</sup> str                                     | 1635 | H <sub>2</sub> O bend                                                | 3125 | NH <sub>3</sub> str                          |
